# Supplementary material for: Effect of Fertilization Regime of Common Wheat (Triticum aestivum) on Flour Quality and Shelf-Life of PDO Tuscan Bread
Source: MDPI journal article supplement (doi:10.3390/foods12142672), 2023-07-11
Supplement: s1 [file s1]

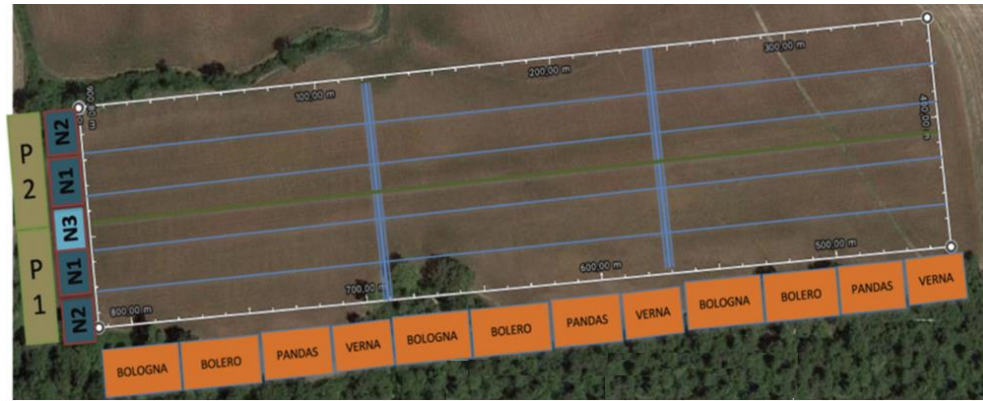

**Figure S1.** Strip-plot design of experimental field in the two years. P arranged in vertical strips as the main plot (P1=46 kg/ha, P2=98 kg/ha), N was assigned to the vertical sub-plots (N1=45 kg/ha, N2=90 kg/ha, N3=135 kg/ha), and varieties were applied horizontally in sub-sub-plots (Bologna, Bolero, Pandas, Verna) with three replicate blocks per year. Each sub-sub-subplot was 1800 m<sup>2</sup>.

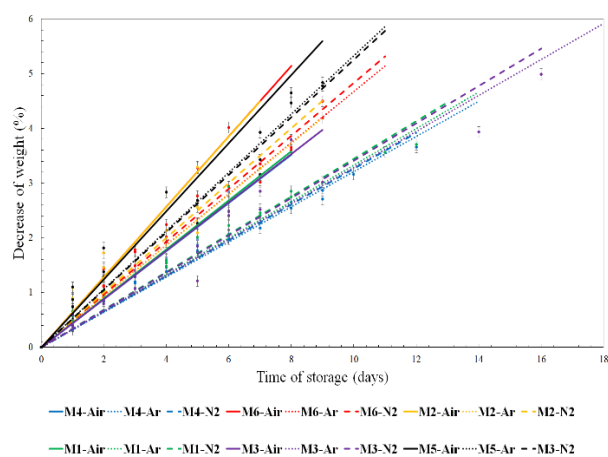

(a)

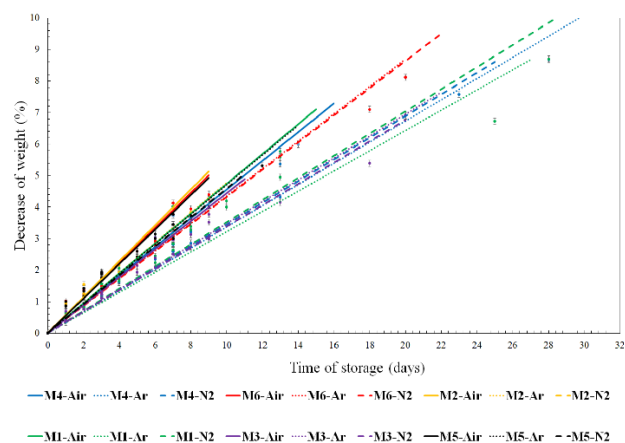

(b)

**Figure S2.** Linear regression of the decrease of weight (%): (a) Year 2019; (b) Year 2020.

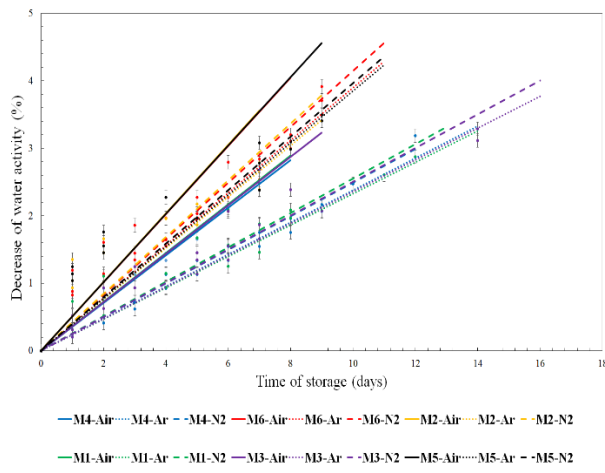

(a)

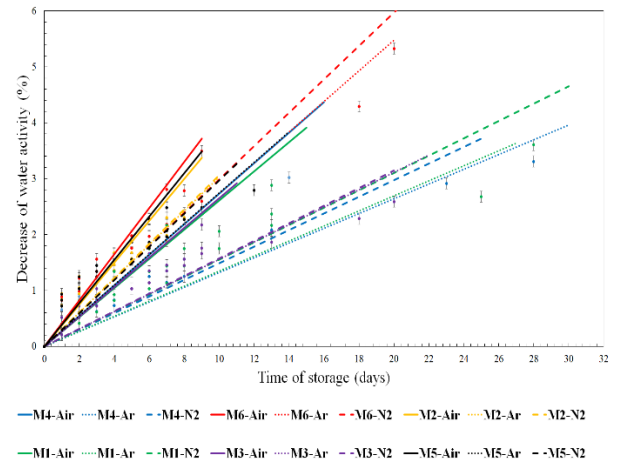

(b)

**Figure S3.** Linear regression of the decrease of water activity (%): (a) Year 2019; (b) Year 2020.

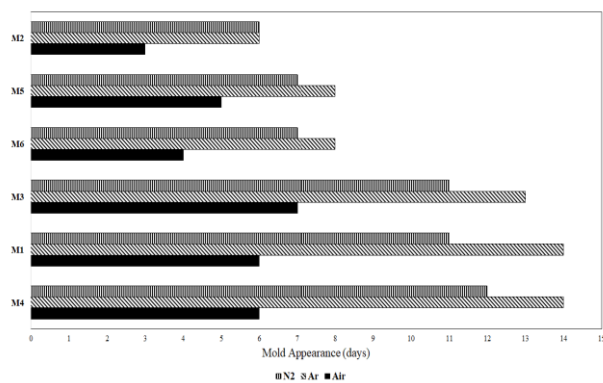

(a)

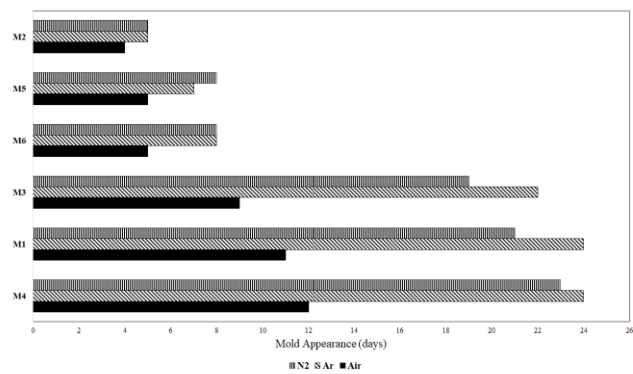

(b)

**Figure S4.** Hedonic index (HI) of the bread after baking ( $t=0$ ): (a) Year 2019; (b) Year 2020. The red line indicates the HI reference limit of shelf-life. Different lowercase letters indicate significant differences at  $p < 0.05$ .

**Table S1.** Average of the chemical and technological parameters for the 6 treatments (T) and for the years 2019 and 2020 (Y).

| Average              |                         |                    |                    |                     |                     |                     |                    |                  |                    |                    |                  |                      |
|----------------------|-------------------------|--------------------|--------------------|---------------------|---------------------|---------------------|--------------------|------------------|--------------------|--------------------|------------------|----------------------|
| Parameters           | Units                   | M1                 | M2                 | M3                  | M4                  | M5                  | M6                 | (T) <sup>1</sup> | 2019               | 2020               | (Y) <sup>1</sup> | (T × Y) <sup>1</sup> |
| <b>Chemical</b>      |                         |                    |                    |                     |                     |                     |                    |                  |                    |                    |                  |                      |
| Humidity             | % w/w                   | 11.11              | 11.07              | 11.07               | 10.95               | 10.55               | 11.02              | ns               | 10.87              | 11.06              | ns               | ns                   |
| Ashes                | % w/w                   | 1.29               | 1.27               | 1.31                | 1.23                | 1.20                | 1.23               | ns               | 1.16 <sup>b</sup>  | 1.35 <sup>a</sup>  | ***              | ns                   |
| Proteins             | % w/w                   | 12.79 <sup>c</sup> | 12.97 <sup>c</sup> | 13.17 <sup>bc</sup> | 13.44 <sup>ab</sup> | 13.86 <sup>ab</sup> | 14.01 <sup>a</sup> | **               | 13.87 <sup>a</sup> | 12.88 <sup>b</sup> | ***              | ns                   |
| Total fats           | % w/w                   | 2.25               | 2.35               | 2.29                | 2.24                | 2.26                | 2.30               | ns               | 2.10               | 2.47               | ns               | ns                   |
| Total dietary fiber  | % w/w                   | 5.42 <sup>c</sup>  | 7.83 <sup>a</sup>  | 5.98 <sup>c</sup>   | 6.01 <sup>c</sup>   | 6.72 <sup>b</sup>   | 6.81 <sup>b</sup>  | ***              | 5.81 <sup>b</sup>  | 7.11 <sup>a</sup>  | ***              | ns                   |
| Sucrose              | % w/w                   | 0.87 <sup>b</sup>  | 0.74 <sup>d</sup>  | 0.92 <sup>a</sup>   | 0.91 <sup>a</sup>   | 0.81 <sup>c</sup>   | 0.80 <sup>c</sup>  | ***              | 0.77 <sup>b</sup>  | 0.91 <sup>a</sup>  | ***              | ***                  |
| Glucose              | % w/w                   | 0.37 <sup>b</sup>  | 0.27 <sup>c</sup>  | 0.38 <sup>a</sup>   | 0.39 <sup>a</sup>   | 0.30 <sup>c</sup>   | 0.31 <sup>c</sup>  | ***              | 0.27 <sup>b</sup>  | 0.40 <sup>a</sup>  | ***              | ns                   |
| Fructose             | % w/w                   | 0.12               | 0.11               | 0.12                | 0.13                | 0.12                | 0.13               | ns               | 0.11               | 0.13               | ns               | ns                   |
| Maltose              | % w/w                   | 6.12 <sup>c</sup>  | 5.47 <sup>i</sup>  | 6.21 <sup>b</sup>   | 6.28 <sup>a</sup>   | 5.83 <sup>d</sup>   | 5.70 <sup>e</sup>  | ***              | 4.92 <sup>b</sup>  | 6.95 <sup>a</sup>  | ***              | ***                  |
| Wet gluten           | % w/w                   | 39.22 <sup>c</sup> | 36.17 <sup>d</sup> | 39.15 <sup>c</sup>  | 38.64 <sup>c</sup>  | 41.22 <sup>b</sup>  | 42.36 <sup>a</sup> | **               | 39.11              | 39.80              | ns               | ns                   |
| Dry gluten           | % w/w                   | 12.01 <sup>c</sup> | 11.03 <sup>d</sup> | 12.04 <sup>c</sup>  | 12.30 <sup>bc</sup> | 12.44 <sup>b</sup>  | 13.34 <sup>a</sup> | ***              | 11.66 <sup>b</sup> | 12.73 <sup>a</sup> | **               | **                   |
| Gluten index         | % w/w                   | 67.62 <sup>c</sup> | 66.21 <sup>c</sup> | 72.23 <sup>a</sup>  | 71.32 <sup>ab</sup> | 70.63 <sup>b</sup>  | 72.92 <sup>a</sup> | *                | 68.32 <sup>b</sup> | 71.98 <sup>a</sup> | *                | ns                   |
| Total Starch         | % w/w                   | 84.97 <sup>c</sup> | 84.02 <sup>d</sup> | 85.75 <sup>b</sup>  | 85.37 <sup>bc</sup> | 86.83 <sup>a</sup>  | 87.02 <sup>a</sup> | ***              | 84.34 <sup>b</sup> | 86.92 <sup>a</sup> | ***              | ns                   |
| Amylose              | % w/w                   | 21.77 <sup>b</sup> | 24.14 <sup>a</sup> | 21.78 <sup>b</sup>  | 21.84 <sup>b</sup>  | 24.73 <sup>a</sup>  | 24.42 <sup>a</sup> | ***              | 24.00 <sup>a</sup> | 22.22 <sup>b</sup> | ***              | ns                   |
| Amylopectin          | % w/w                   | 78.26 <sup>a</sup> | 75.94 <sup>b</sup> | 78.27 <sup>a</sup>  | 78.25 <sup>a</sup>  | 75.32 <sup>b</sup>  | 75.68 <sup>b</sup> | ***              | 76.07 <sup>b</sup> | 77.83 <sup>a</sup> | ***              | ns                   |
| Falling number       | seconds                 | 318                | 315                | 320                 | 319                 | 316                 | 321                | ns               | 307                | 329                | ns               | ns                   |
| Total polyphenol     | mg GAE/kg dm            | 735 <sup>a</sup>   | 599 <sup>b</sup>   | 722 <sup>a</sup>    | 742 <sup>a</sup>    | 580 <sup>b</sup>    | 566 <sup>b</sup>   | ***              | 533 <sup>b</sup>   | 781 <sup>a</sup>   | ***              | **                   |
| Total flavonoids     | mg CE/kg dm             | 65.82 <sup>b</sup> | 54.93 <sup>d</sup> | 63.45 <sup>c</sup>  | 67.42 <sup>a</sup>  | 50.44 <sup>f</sup>  | 53.42 <sup>e</sup> | ***              | 50.33 <sup>b</sup> | 68.16 <sup>a</sup> | ***              | ***                  |
| ABTS                 | μmol TE/g dm            | 0.97 <sup>ab</sup> | 0.68 <sup>c</sup>  | 0.89 <sup>b</sup>   | 1.03 <sup>a</sup>   | 0.65 <sup>c</sup>   | 0.54 <sup>d</sup>  | ***              | 0.62 <sup>b</sup>  | 0.96 <sup>a</sup>  | ***              | ns                   |
| DPPH                 | μmol TE/g dm            | 0.55 <sup>ab</sup> | 0.42 <sup>c</sup>  | 0.52 <sup>b</sup>   | 0.60 <sup>a</sup>   | 0.41 <sup>c</sup>   | 0.40 <sup>c</sup>  | ***              | 0.37 <sup>b</sup>  | 0.60 <sup>a</sup>  | ***              | **                   |
| FRAP                 | μmol TE/g dm            | 1.15 <sup>ab</sup> | 0.89 <sup>c</sup>  | 1.11 <sup>b</sup>   | 1.19 <sup>a</sup>   | 0.86 <sup>c</sup>   | 0.74 <sup>d</sup>  | **               | 0.67 <sup>b</sup>  | 1.31 <sup>a</sup>  | ***              | ns                   |
| <b>Technological</b> |                         |                    |                    |                     |                     |                     |                    |                  |                    |                    |                  |                      |
| W                    | 10 <sup>-4</sup> joules | 239                | 255                | 248                 | 250                 | 266                 | 272                | ns               | 246                | 263                | ns               | ns                   |
| P/L                  |                         | 2.12 <sup>b</sup>  | 2.42 <sup>a</sup>  | 2.04 <sup>b</sup>   | 2.17 <sup>b</sup>   | 2.48 <sup>a</sup>   | 2.56 <sup>a</sup>  | **               | 1.80 <sup>b</sup>  | 2.80 <sup>a</sup>  | *                | ns                   |
| P                    | mm                      | 131                | 137                | 128                 | 132                 | 136                 | 137                | ns               | 110 <sup>b</sup>   | 157 <sup>a</sup>   | **               | ns                   |
| L                    | mm                      | 56 <sup>a</sup>    | 48 <sup>b</sup>    | 55 <sup>a</sup>     | 58 <sup>a</sup>     | 46 <sup>b</sup>     | 48 <sup>b</sup>    | *                | 44 <sup>b</sup>    | 59 <sup>a</sup>    | *                | ns                   |
| G                    |                         | 14.5 <sup>a</sup>  | 13.4 <sup>b</sup>  | 14.6 <sup>a</sup>   | 14.4 <sup>a</sup>   | 13.7 <sup>b</sup>   | 13.8 <sup>b</sup>  | *                | 13.1 <sup>b</sup>  | 15.0 <sup>a</sup>  | *                | ns                   |
| Water absorption     | %                       | 67.9 <sup>b</sup>  | 71.4 <sup>a</sup>  | 67.9 <sup>b</sup>   | 67.7 <sup>b</sup>   | 71.0 <sup>a</sup>   | 70.5 <sup>a</sup>  | ***              | 69.0               | 69.7               | ns               | *                    |
| Dough time           | Minutes                 | 5.1                | 4.7                | 5.3                 | 4.8                 | 5.0                 | 4.8                | ns               | 5.4                | 4.4                | ns               | ns                   |
| Stability            | Minutes                 | 5.6                | 5.1                | 5.1                 | 5.4                 | 5.5                 | 5.6                | ns               | 4.8                | 5.9                | ns               | ns                   |
| E10                  | UF                      | 44                 | 54                 | 50                  | 48                  | 53                  | 47                 | ns               | 47                 | 51                 | ns               | ns                   |
| E(ICC)               | UF                      | 78                 | 82                 | 78                  | 85                  | 83                  | 84                 | ns               | 76                 | 86                 | ns               | ns                   |
| FQN                  |                         | 80                 | 69                 | 75                  | 77                  | 71                  | 70                 | ns               | 69                 | 78                 | ns               | ns                   |

<sup>1</sup> Significance level: \*\*\*  $p \leq 0.001$ ; \*\*  $p \leq 0.01$ ; \*  $p \leq 0.05$ ; ns=not significant ( $p > 0.05$ ). In the same row, different letters indicate significant differences among samples.
